# Supplementary material for: Puerarin extends the lifespan of Drosophila melanogaster by activating autophagy
Source: Royal Society of Chemistry journal article supplement (doi:10.1039/d2fo02800j), 2023-01-01

## The First Western Blot

Figure 1G. Original data of WB

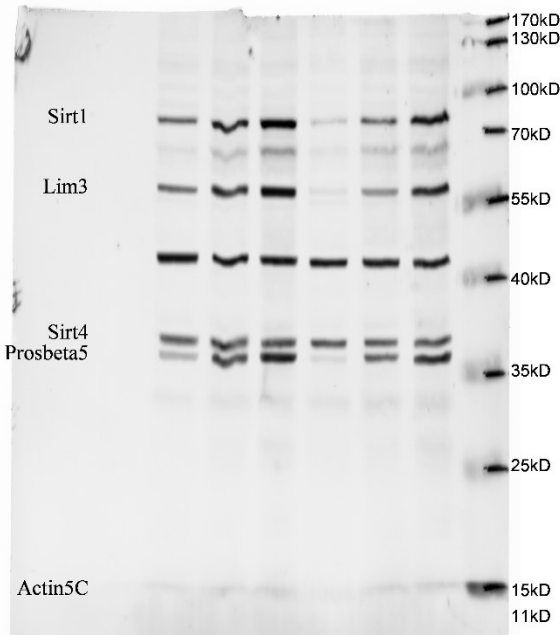

Figure 2E. Original data of WB

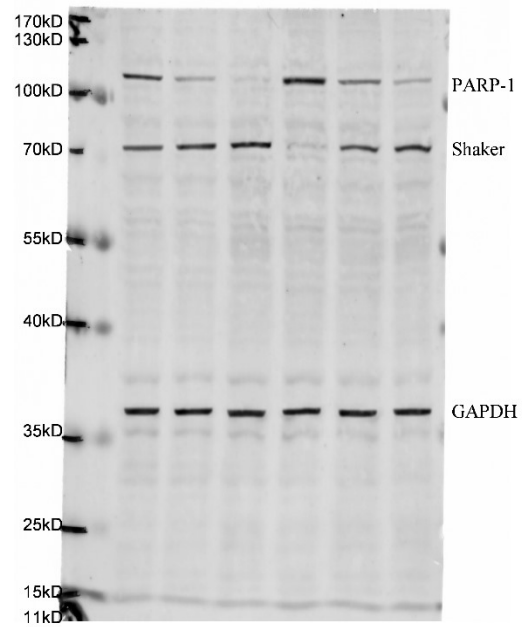

Figure 3D. Original data of WB

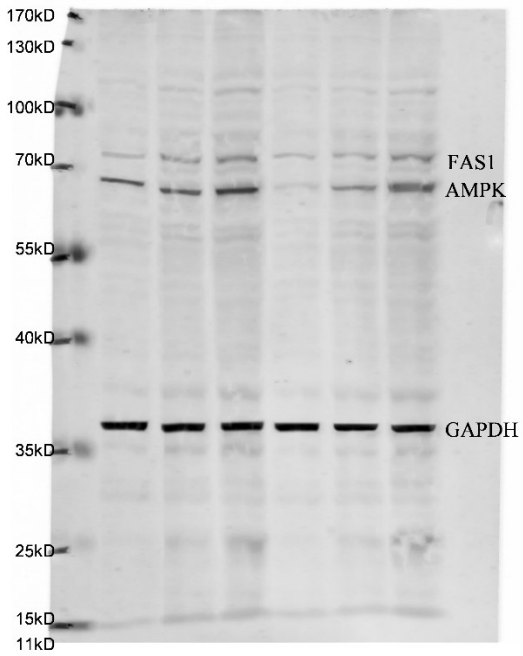

Figure 4L. Original data of WB

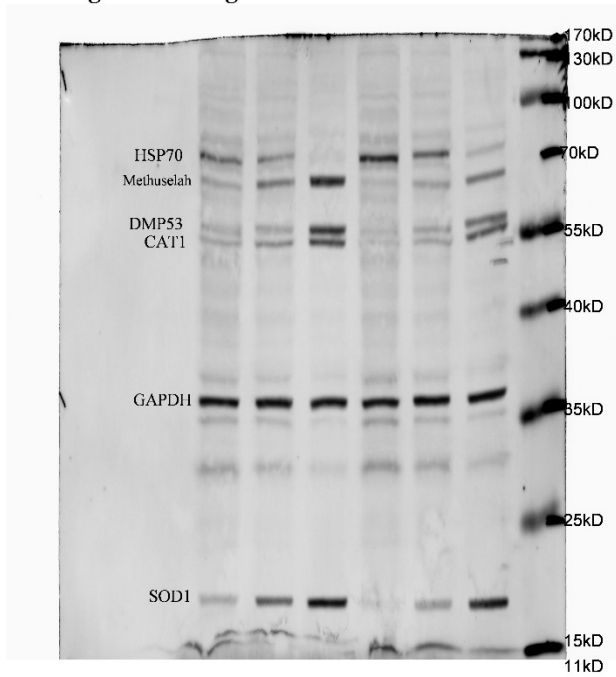

# The First Western Blot

Figure 5C. Original data of WB

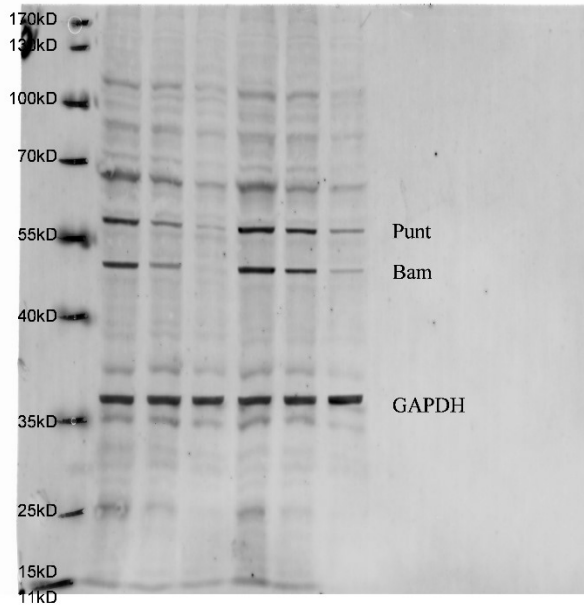

Figure 6B. Original data of WB

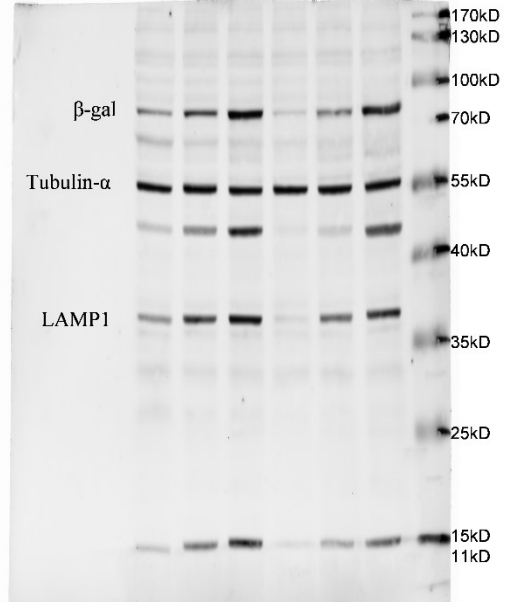

Figure 6E. Original data of WB

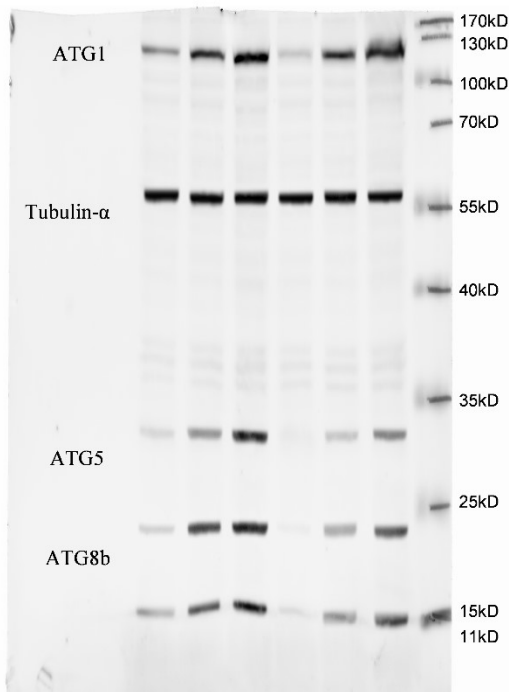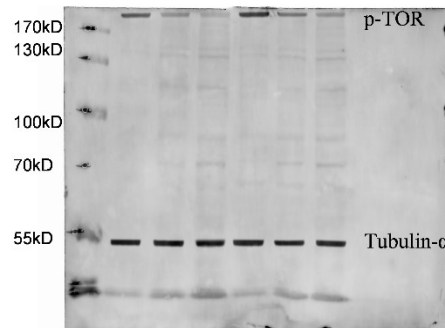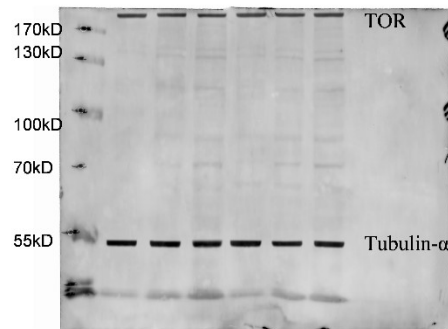

## The Second Western Blot

Figure 1G. Original data of WB

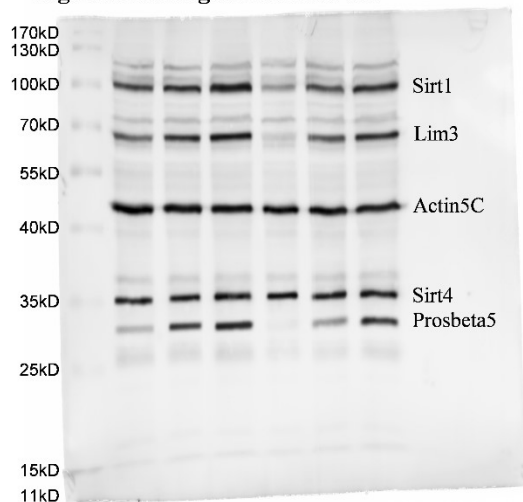

Figure 2E. Original data of WB

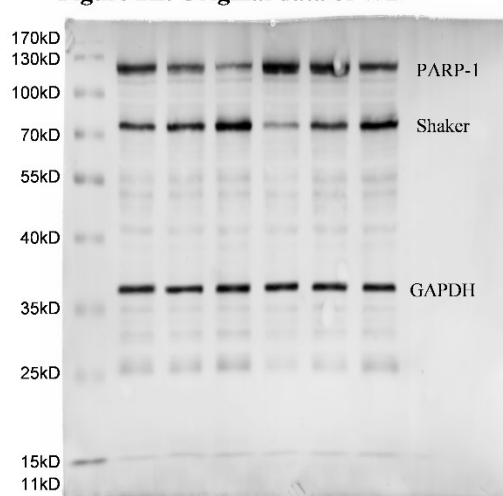

Figure 3D. Original data of WB

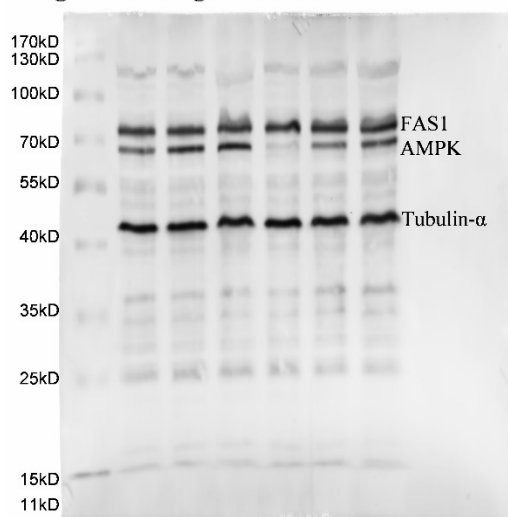

Figure 4L. Original data of WB

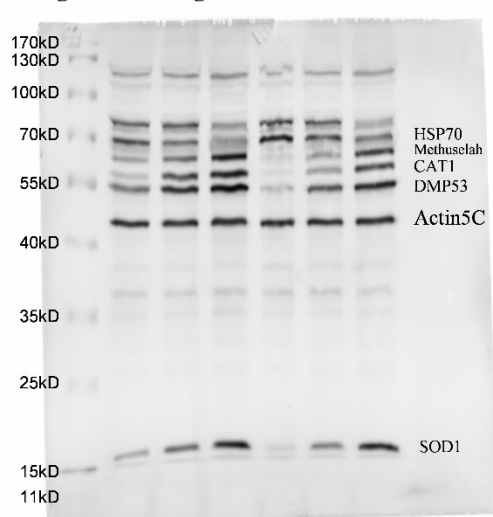

## The Second Western Blot

Figure 5C. Original data of WB

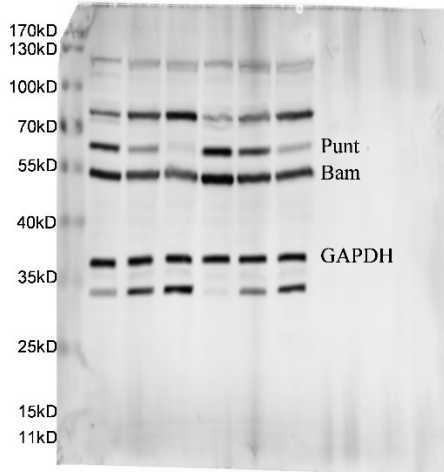

Figure 6B. Original data of WB

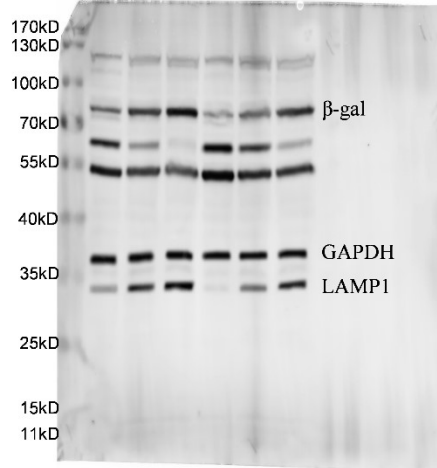

Figure 6E. Original data of WB

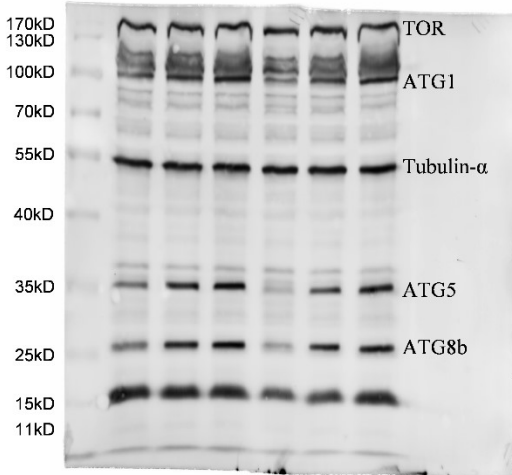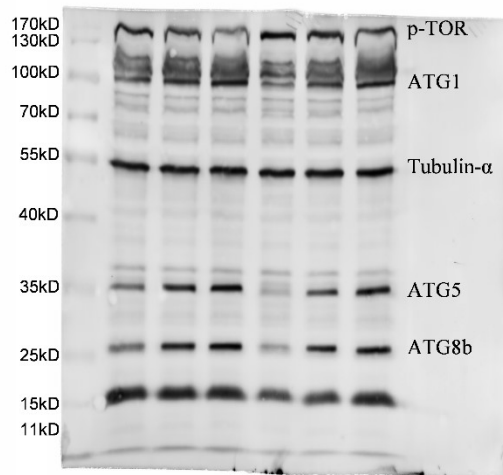

# The Third Western Blot

Figure 1G. Original data of WB

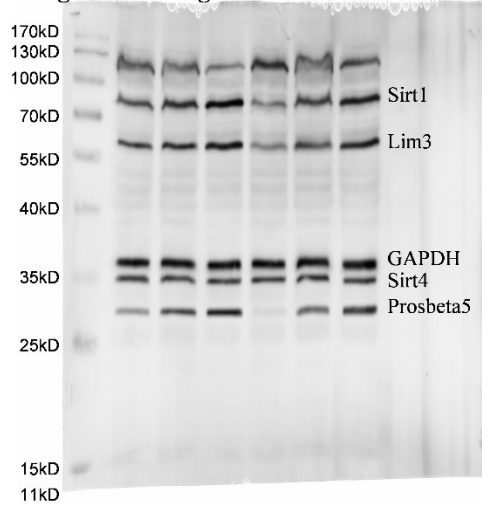

Figure 2E. Original data of WB

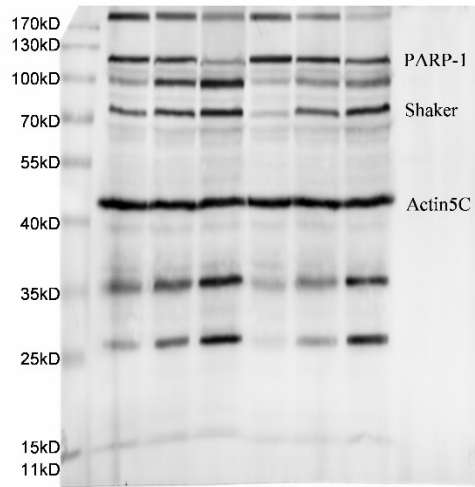

Figure 6E. Original data of WB

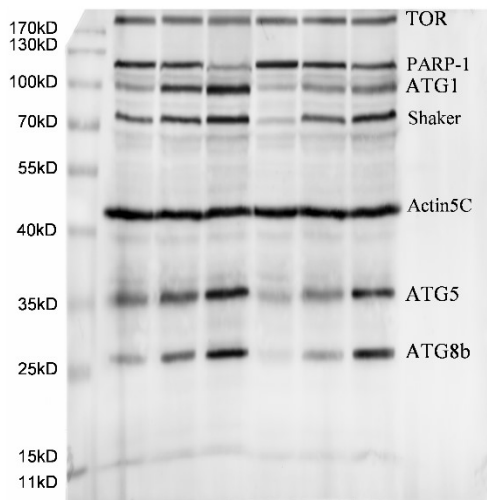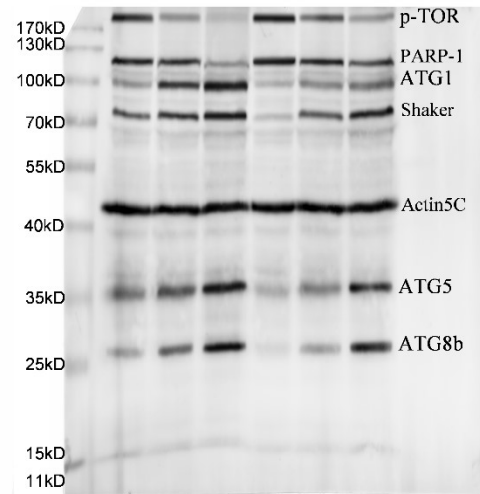

# The Third Western Blot

Figure 3D. Original data of WB

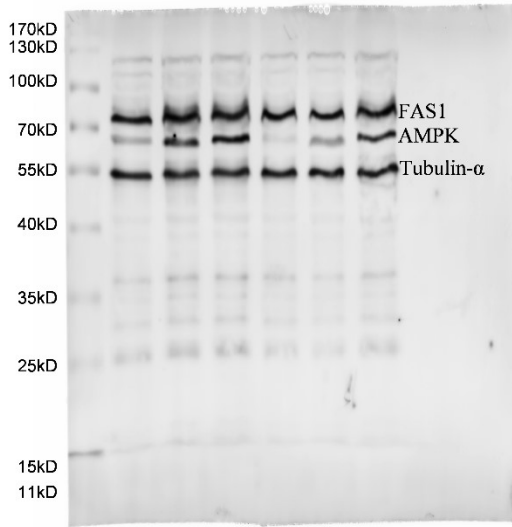

Figure 4L. Original data of WB

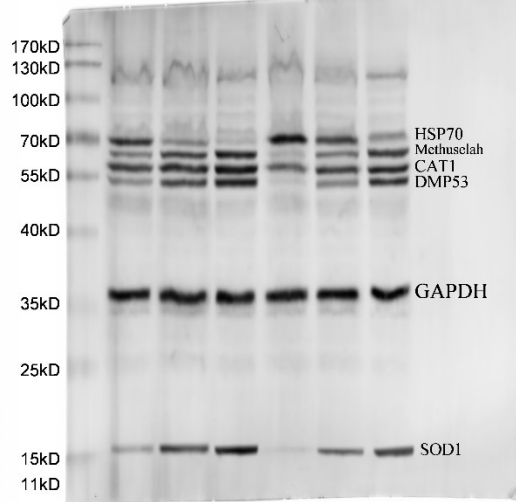

Figure 5C. Original data of WB

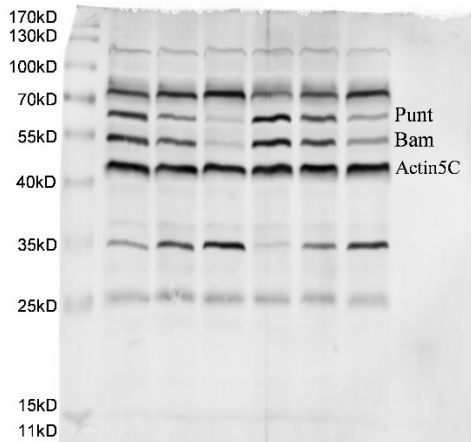

Figure 6B. Original data of WB

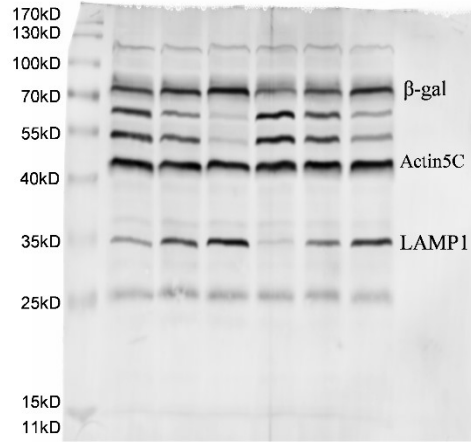

Supplement: d2fo02800j2.pdf [file d2fo02800j2.pdf]
