# Supplementary material for: Puerarin extends the lifespan of Drosophila melanogaster by activating autophagy
Source: Royal Society of Chemistry journal article supplement (doi:10.1039/d2fo02800j), 2023-01-01
Supplement: d2fo02800j1.xlsx [file d2fo02800j1.xlsx]

## Sheet: Fig.1A, B
The First experiment: Puerarin for whole lifespan						The Second experiment					The Third experiment					The Fourth experiment
	The number of survival flies						The number of survival flies					The number of survival flies					The number of survival flies
Days	control	60μM	120μM			Days	control	60μM	120μM		Days	control	60μM	120μM		Days	control	60μM	120μM
0	0	0	0			0	0	0	0		0	0	0	0		0	0	0	0
4	0	0	0			4	0	0	0		4	0	0	1		4	0	0	0
6	3	3	4			6	3	1	2		6	2	3	3		6	0	1	1
8	2	2	2			8	1	2	2		8	2	2	2		8	2	2	1
10	2	2	1			10	2	3	4		10	2	2	1		10	2	2	1
12	2	1	2			12	4	3	3		12	2	1	2		12	2	2	2
14	3	1	1			14	4	3	2		14	2	1	1		14	1	1	0
16	3	6	2			16	3	2	3		16	2	4	2		16	3	2	1
18	4	1	2			18	5	3	2		18	3	1	2		18	3	3	1
20	5	3	4			20	6	5	2		20	5	3	4		20	2	1	2
22	6	5	3			22	7	6	5		22	6	5	3		22	5	2	1
24	6	4	4			24	7	5	5		24	6	4	4		24	6	4	4
26	8	6	4			26	8	7	4		26	8	6	4		26	6	4	5
28	9	6	4			28	7	7	5		28	9	6	4		28	8	6	7
30	8	10	7			30	6	5	4		30	7	10	7		30	9	8	6
32	7	8	7			32	7	7	5		32	6	8	7		32	11	9	8
34	6	7	6			34	6	3	5		34	6	7	6		34	7	9	9
36	6	8	6			36	6	8	7		36	6	8	11		36	7	10	11
38	8	6	6			38	8	8	6		38	8	6	6		38	7	7	8
40	7	8	6			40	5	9	5		40	7	8	6		40	6	6	6
42	5	6	7			42	6	8	6		42	5	6	7		42	6	8	5
44	6	5	7			44	6	8	7		44	6	5	7		44	6	5	8
46	4	5	7			46	6	6	7		46	4	5	7		46	7	5	5
48	5	7	8			48	3	5	6		48	6	7	7		48	5	6	5
50	3	5	6			50	2	3	7		50	5	5	6		50	4	5	4
52	2	3	5			52	1	2	7		52	3	3	4		52	2	3	5
54		2	3			54	1	1	5		54	2	3	3		54	2	2	5
56			3			56			2		56		1	1		56	1	3	4
58			2			58			2		58			1		58	0	2	2
60			1								60			1		60	0	2	2
Median of lifespan	28	34	36			Median of lifespan	28	32	34		Median of lifespan	30	32	34		Median of lifespan	30	32	34

## Sheet: Fig.1C, D
	The First experiment										The Second experiment									The Third experiment
		The number of survival flies										The number of survival flies									The number of survival flies
		Group α	Group β	Group γ	Group δ	Group λ						Group α	Group β	Group γ	Group δ	Group λ					Group α	Group β	Group γ	Group δ	Group λ
	Days	control	puerarin	10d puerarin + 50d control	30d puerarin + 30d control	30d control + 30d puerarin					Days	control	puerarin	10d puerarin + 50d control	30d puerarin + 30d control	30d control + 30d puerarin				Days	control	puerarin	10d puerarin + 50d control	30d puerarin + 30d control	30d control + 30d puerarin
	0	0	0	0	0	0					0	0	0	0	0	0				0	0	0	0	0	0
	2	0	0	0	0	0					2	0	0	0	0	0				2	0	0	0	0	0
	4	2	4	3	2	2					4	2	2	0	2	2				4	2	1	1	1	2
	6	0	0	2	3	6					6	2	3	3	3	3				6	2	2	3	3	2
	8	5	4	3	3	1					8	3	2	5	3	3				8	1	3	4	2	3
	10	6	2	7	2	3					10	5	3	5	2	2				10	4	3	3	3	2
	12	6	8	2	5	5					12	5	5	4	5	4				12	3	2	3	4	3
	14	3	1	6	2	5					14	5	3	3	2	4				14	4	4	3	6	4
	16	6	3	3	4	8					16	5	4	4	4	6				16	6	4	5	4	6
	18	4	4	4	5	3					18	5	4	5	5	5				18	5	6	7	5	5
	20	5	7	5	5	4					20	5	4	7	5	6				20	7	7	7	5	8
	22	9	7	8	6	7					22	8	7	6	6	6				22	7	8	6	7	6
	24	7	6	7	6	9					24	7	6	10	6	8				24	8	6	7	6	9
	26	8	8	3	5	9					26	8	7	8	5	8				26	7	6	7	8	5
	28	6	7	9	9	9					28	7	7	7	9	7				28	11	7	8	6	10
	30	9	7	9	4	8					30	8	9	7	5	8				30	10	6	11	7	13
	32	13	4	11	11	9					32	10	6	7	8	10				32	8	8	8	9	7
	34	10	8	9	9	10					34	9	10	11	11	7				34	8	8	8	8	11
	36	7	8	8	8	9					36	8	5	6	8	7				36	8	8	9	7	6
	38	8	9	9	6	6					38	8	7	9	6	8				38	9	5	8	8	6
	40	8	8	9	8	8					40	10	7	9	8	11				40	7	7	7	9	7
	42	9	7	8	11	7					42	11	9	11	9	11				42	8	8	9	7	6
	44	7	8	6	7	6					44	9	8	7	8	10				44	9	7	9	6	7
	46	7	5	9	6	8					46	8	7	8	8	7				46	7	7	6	5	7
	48	8	6	4	7	6					48	7	6	7	7	7				48	7	8	5	5	8
	50	5	9	7	10	8					50	3	6	5	7	5				50	5	6	7	5	6
	52	2	8	5	8	4					52	2	3	3	7	3				52	4	4	5	7	5
	54	0	7	4	4	0					54	0	6	3	5	2				54	3	5	3	6	4
	56	0	4	0	4	0					56	0	5	0	3	0				56	0	6	1	5	2
	58	0	1	0	0	0					58	0	4	0	3	0				58	0	3	0	2	0
											59	0	3	0	0	0				60	0	4	0	4	0
	Median of lifespan	30	34	30	32	30					60	0	2	0	0	0				62	0	1	0	0	0
											Median of lifespan	30	32	30	32	30				Median of lifespan	30	32	30	32	30

## Sheet: Fig.2A
	The First experiment: Puerarin diet for 10 days
		Control (20 flies per tube)						60 μM Puerarin (20 flies per tube)						120 μM Puerarin (20 flies per tube)
		Tube 1	Tube 2	Tube 3	Tube 4			Tube 1	Tube 2	Tube 3	Tube 4			Tube 1	Tube 2	Tube 3	Tube 4
	Total body weight of flies in each tube	18.21	19.63	18.4	18.81			18.31	18.11	18.42	18.44			21.21	19.71	18.43	19.62
	Average body weight per fly in each tube	0.9105	0.9815	0.92	0.9405			0.9155	0.9055	0.921	0.922			1.0605	0.9855	0.9215	0.981
	Average body weight of every group	0.938125						0.916						0.987125
	The First experiment: Puerarin diet for 25 days
		Control (20 flies per tube)						60 μM Puerarin (20 flies per tube)						120 μM Puerarin (20 flies per tube)
		Tube 1	Tube 2	Tube 3	Tube 4			Tube 1	Tube 2	Tube 3	Tube 4			Tube 1	Tube 2	Tube 3	Tube 4
	Total body weight of flies in each tube	25.13	25.26	23.87	24.18			25.31	24.42	25.65	24.27			26.28	25.24	25.11	25.23
	Average body weight per fly in each tube	1.2565	1.263	1.1935	1.209			1.2655	1.221	1.2825	1.2135			1.314	1.262	1.2555	1.2615
	Average body weight of every group	1.2305						1.24562						1.27325
	The Second experiment: Puerarin diet for 10 days
		Control (20 flies per tube)						60 μM Puerarin (20 flies per tube)						120 μM Puerarin (20 flies per tube)
		Tube 1	Tube 2	Tube 3	Tube 4			Tube 1	Tube 2	Tube 3	Tube 4			Tube 1	Tube 2	Tube 3	Tube 4
	Total body weight of flies in each tube	17.92	20.15	18.41	19.03			18.31	18.25	18.8	18.46			21.27	19.51	18.37	20.12
	Average body weight per fly in each tube	0.896	1.0075	0.9205	0.9515			0.9155	0.9125	0.94	0.923			1.0635	0.9755	0.9185	1.006
	Average body weight of every group	0.943875						0.92275						0.990875
	The Second experiment: Puerarin diet for 25 days
		Control (20 flies per tube)						60 μM Puerarin (20 flies per tube)						120 μM Puerarin (20 flies per tube)
		Tube 1	Tube 2	Tube 3	Tube 4			Tube 1	Tube 2	Tube 3	Tube 4			Tube 1	Tube 2	Tube 3	Tube 4
	Total body weight of flies in each tube	25.15	25.22	23.81	24.61			24.92	24.63	25.59	24.18			26.2	25.36	25.19	25.08
	Average body weight per fly in each tube	1.2575	1.261	1.1905	1.2305			1.246	1.2315	1.2795	1.209			1.31	1.268	1.2595	1.254
	Average body weight of every group	1.23487						1.2415						1.27287
	The Third experiment: Puerarin diet for 10 days
		Control (20 flies per tube)						60 μM Puerarin (20 flies per tube)						120 μM Puerarin (20 flies per tube)
		Tube 1	Tube 2	Tube 3	Tube 4			Tube 1	Tube 2	Tube 3	Tube 4			Tube 1	Tube 2	Tube 3	Tube 4
	Total body weight of flies in each tube	18.11	20.19	19.02	18.96			19.13	18.61	18.97	19.05			20.97	20.41	18.55	20.27
	Average body weight per fly in each tube	0.9055	1.0095	0.951	0.948			0.9565	0.9305	0.9485	0.9525			1.0485	1.0205	0.9275	1.0135
	Average body weight of every group	0.9535						0.947						1.0025
	The Third experiment: Puerarin diet for 25 days
		Control (20 flies per tube)						60 μM Puerarin (20 flies per tube)						120 μM Puerarin (20 flies per tube)
		Tube 1	Tube 2	Tube 3	Tube 4			Tube 1	Tube 2	Tube 3	Tube 4			Tube 1	Tube 2	Tube 3	Tube 4
	Total body weight of flies in each tube	25.07	25.09	24.11	25.14			25.01	25.17	25.24	24.26			25.8	25.72	25.39	25.44
	Average body weight per fly in each tube	1.2535	1.2545	1.2055	1.257			1.2505	1.2585	1.262	1.213			1.29	1.286	1.2695	1.272
	Average body weight of every group	1.24262						1.246						1.27938

## Sheet: Fig.2B
	Standard curve											6
	μg/ml (Bright blue)	OD
	0	0.0361
	1	0.079
	2	0.1324
	4	0.2256
	6	0.3217
	8	0.4107
	10	0.4958
	The First experiment: Absorbance (OD)											The First experiment: Relative food intake
		0			60 μM Puerarin			120 μM Puerarin					0			60 μM Puerarin			120 μM Puerarin
		Tube 1	Tube 2	Tube 3	Tube 1	Tube 2	Tube 3	Tube 1	Tube 2	Tube 3			Tube 1	Tube 2	Tube 3	Tube 1	Tube 2	Tube 3	Tube 1	Tube 2	Tube 3
	10d	0.1026	0.1036	0.1041	0.105911	0.1031	0.101186	0.101589	0.10225	0.103716		10d	1	1.00975	1.01462	1.03227	1.00487	0.986218	0.990149	0.996589	1.01088
	25d	0.128731	0.11987	0.12544	0.135373	0.13196	0.13079	0.140033	0.139412	0.139886		25d	1.25469	1.16832	1.22261	1.31943	1.28616	1.27476	1.36484	1.35879	1.36341
	The Second experiment: Absorbance (OD)											The Second experiment: Relative food intake
	lot2	0			60			120					0			60			120
	10d	0.0927	0.10321	0.099768	0.0867687	0.09168	0.106733	0.0937549	0.100684	0.099761		10d	1	1.11338	1.07625	0.936016	0.988997	1.15138	1.01138	1.08613	1.07617
	25d	0.111271	0.131526	0.10943	0.112343	0.11107	0.109974	0.128404	0.10946	0.120795		25d	1.20033	1.41883	1.18047	1.2119	1.19817	1.18634	1.38516	1.1808	1.30307
	The Third experiment: Absorbance (OD)											The Third experiment: Absorbance (OD)
		0			60			120					0			60			120
	10d	0.0986	0.13697	0.11068	0.110394	0.103648	0.11514	0.10945	0.10235	0.091562		10d	1	1.38915	1.12252	1.11962	1.0512	1.16775	1.11004	1.03803	0.928621
	25d	0.12654	0.116874	0.12568	0.116186	0.10742	0.11657	0.119923	0.113612	0.110682		25d	1.28337	1.18533	1.27465	1.17836	1.08945	1.18225	1.21626	1.15225	1.12254

## Sheet: Fig.2C
	The mean of three repeat experiments from each tube (Climbing activity)
	Group	Tube 1	Tube 2	Tube 3	Tube 4	Tube 5	Tube 6
Puerarin diet for 10d	0 μM	4	4	3	2	1	1
	60 μM	7	6	6	5	5	4
	120 μM	11	10	9	9	8	8
Puerarin diet for 25d	0 μM	3	3	2	2	1	1
	60 μM	5	4	3	3	2	1
	120 μM	6	5	5	5	4	3

## Sheet: Fig.3A
OD value of Blank	0.0919			Protein standard curve
	0.0902			Concentration of BSA (mg/ml)	OD
OD value of Blank (mean)	0.09105			1.5	2.4437
OD value of TG quatitation standard (2.26 mmol/L)	0.4506			1	2.1861
	0.4511
OD value ofTG quatitation standard (mean)	0.45085			0.75	2.0098
				0.5	1.8395
				0.25	1.6581
				0.125	1.5243
				0	1.4505
We used 70 μl isopropanol to extract TG of flies in each tube (body weight (g) : Volume (ml)=1:9. We prepared 10 flies for each tube, and 4 tubes for each group.
TG (μmol/g)=(OD of tested sample-OD of Blank)/(OD of TG quatitation standard-OD of Blank)*concentration of TG quatitation standard*Dilution mutiple/(protein concentration of tested sample/Volume of Isopropanol)
The First experiment: 10 days							The Second experiment: 10 days							The Third experiment: 10 days
10d	OD value of TG	TG (μmol/g)	Total protein (OD)	Total protein (mg/ml)	TG/Total protein (μmol/g protein)		10d	OD value of TG	TG (μmol/g)	Total protein (OD)	Total protein (mg/ml)	TG/Total protein (μmol/g protein)		10d	OD value of TG	TG (μmol/g)	Total protein (OD)	Total protein (mg/ml)	TG/Total protein (μmol/g protein)
0 μM (Tube 1)	0.116332	1.42923	2.4813	1.48796	0.96		0 μM (Tube 1)	0.13	2.2019	2.51	1.53037	1.4388		0 μM (Tube 1)	0.14	2.76721	2.46	1.45648	1.89993
0 μM (Tube 2)	0.128469	2.11536	2.8634	2.05261	1.03		0 μM (Tube 2)	0.13	2.2019	2.76	1.89981	1.15901		0 μM (Tube 2)	0.16	3.89784	2.66	1.75203	2.22475
0 μM (Tube 3)	0.12406	1.86608	2.8029	1.9632	0.95		0 μM (Tube 3)	0.12	1.63658	2.71	1.82592	0.896307		0 μM (Tube 3)	0.12	1.63658	2.76	1.89981	0.861447
0 μM (Tube 4)	0.141896	2.87442	2.863	2.05202	1.4		0 μM (Tube 4)	0.15	3.33253	2.73	1.85548	1.79605		0 μM (Tube 4)	0.13	2.2019	2.68	1.78159	1.23592
60 μM (Tube 1)	0.137215	2.60977	2.9094	2.12059	1.23		60 μM (Tube 1)	0.15	3.33253	3.03	2.2988	1.44968		60 μM (Tube 1)	0.15	3.33253	2.91	2.12147	1.57086
60 μM (Tube 2)	0.140854	2.81546	3.0881	2.38466	1.18		60 μM (Tube 2)	0.12	1.63658	3.02	2.28403	0.716535		60 μM (Tube 2)	0.14	2.76721	2.94	2.1658	1.27768
60 μM (Tube 3)	0.133133	2.37901	2.9642	2.20157	1.08		60 μM (Tube 3)	0.13	2.2019	2.79	1.94414	1.13258		60 μM (Tube 3)	0.13	2.2019	2.83	2.00325	1.09916
60 μM (Tube 4)	0.132941	2.36813	2.7557	1.89345	1.25		60 μM (Tube 4)	0.14	2.76721	2.82	1.98847	1.39163		60 μM (Tube 4)	0.15	3.33253	2.75	1.88503	1.76789
120 μM (Tube 1)	0.127204	2.04384	2.8567	2.04271	1		120 μM (Tube 1)	0.14	2.76721	2.83	2.00325	1.38136		120 μM (Tube 1)	0.13	2.2019	2.9	2.10669	1.04519
120 μM (Tube 2)	0.126477	2.00276	2.9467	2.17571	0.92		120 μM (Tube 2)	0.12	1.63658	2.76	1.89981	0.861447		120 μM (Tube 2)	0.13	2.2019	2.68	1.78159	1.23592
120 μM (Tube 3)	0.129151	2.15389	2.7987	1.957	1.1		120 μM (Tube 3)	0.15	3.33253	2.81	1.9737	1.68847		120 μM (Tube 3)	0.14	2.76721	2.78	1.92936	1.43426
120 μM (Tube 4)	0.142389	2.90226	2.8567	2.04271	1.42		120 μM (Tube 4)	0.13	2.2019	2.91	2.12147	1.03791		120 μM (Tube 4)	0.14	2.76721	2.96	2.19536	1.26048
The First experiment: 25 days							The Second experiment: 25 days							The Third experiment: 25 days
25d	OD value of TG	TG (μmol/g)	Total protein (OD)	Total protein (mg/ml)	TG/protein (μmol/g protein)		25d	OD value of TG	TG (μmol/g)	Total protein (OD)	Total protein (mg/ml)	TG/protein (μmol/g protein)		25d	OD value of TG	TG (μmol/g)	Total protein (OD)	Total protein (mg/ml)	TG/protein (μmol/g protein)
0 μM (Tube 1)	0.170424	4.48712	3.0071	2.26496	1.98		0 μM (Tube 1)	0.16	3.89784	3.11	2.41702	1.61266		0 μM (Tube 1)	0.16	3.89784	2.86	2.04758	1.90363
0 μM (Tube 2)	0.136499	2.5693	2.9724	2.21368	1.16		0 μM (Tube 2)	0.15	3.33253	2.63	1.7077	1.95147		0 μM (Tube 2)	0.15	3.33253	2.71	1.82592	1.82512
0 μM (Tube 3)	0.145175	3.05978	2.854	2.03872	1.5		0 μM (Tube 3)	0.16	3.89784	2.74	1.87025	2.08413		0 μM (Tube 3)	0.16	3.89784	2.77	1.91459	2.03587
0 μM (Tube 4)	0.170655	4.50018	2.9737	2.21561	2.03		0 μM (Tube 4)	0.16	3.89784	2.85	2.03281	1.91747		0 μM (Tube 4)	0.16	3.89784	2.91	2.12147	1.83733
60 μM (Tube 1)	0.146878	3.15606	2.9364	2.16048	1.46		60 μM (Tube 1)	0.17	4.46315	2.73	1.85548	2.4054		60 μM (Tube 1)	0.17	4.46315	2.81	1.9737	2.26132
60 μM (Tube 2)	0.134208	2.43981	3.0311	2.30043	1.06		60 μM (Tube 2)	0.14	2.76721	2.94	2.1658	1.27768		60 μM (Tube 2)	0.14	2.76721	2.28	1.19048	2.32444
60 μM (Tube 3)	0.133446	2.39669	2.9615	2.19758	1.09		60 μM (Tube 3)	0.13	2.2019	3.02	2.28403	0.964043		60 μM (Tube 3)	0.13	2.2019	2.53	1.55992	1.41154
60 μM (Tube 4)	0.155504	3.64368	3.0746	2.36471	1.54		60 μM (Tube 4)	0.17	4.46315	2.89	2.09192	2.13352		60 μM (Tube 4)	0.17	4.46315	3.01	2.26925	1.9668
120 μM (Tube 1)	0.14719	3.17367	2.9754	2.21812	1.43		120 μM (Tube 1)	0.14	2.76721	3.05	2.32836	1.18848		120 μM (Tube 1)	0.14	2.76721	3.11	2.41702	1.14488
120 μM (Tube 2)	0.153297	3.51894	2.9435	2.17098	1.62		120 μM (Tube 2)	0.14	2.76721	3.11	2.41702	1.14488		120 μM (Tube 2)	0.14	2.76721	2.88	2.07714	1.33222
120 μM (Tube 3)	0.16758	4.32636	2.8546	2.0396	2.12		120 μM (Tube 3)	0.16	3.89784	2.96	2.19536	1.77549		120 μM (Tube 3)	0.16	3.89784	3.02	2.28403	1.70657
120 μM (Tube 4)	0.176644	4.83875	3.0865	2.3823	2.03		120 μM (Tube 4)	0.17	4.46315	3.12	2.4318	1.83533		120 μM (Tube 4)	0.17	4.46315	3.07	2.35791	1.89284

## Sheet: Fig.3B
The First experiment: We prepared 15 flies for each tube, and three tubes for each group
		Puerarin (μM)	OD value of ATP in each tube			The mean OD value of ATP in each group	OD value of total protein	Total protein (mg/ml)	ATP content/Total protein	Relative ATP content
			Tube 1	Tube 2	Tube 3
1	Puerarin diet for 10 days	0	138.432	152.486	140.341	143.753	2.926	1.67	86.0796	1
2		60	146.635	145.536	145.055	145.742	2.90795	1.65	88.3284	1.02612
3		120	156.94	158.285	157.672	157.632	2.997	1.74	90.5933	1.05244
4	Puerarin diet for 25 days	0	265.826	263.835	257.908	262.523	3.056	1.8	145.846	1.69432
5		60	287.265	289.568	291.944	289.592	3.029	1.77	163.611	1.9007
6		120	322.541	324.593	317.15	321.428	2.915	1.66	193.631	2.24944
The Second experiment: We prepared 15 flies for each tube, and three tubes for each group
		Puerarin (μM)	OD value of ATP in each tube			The mean OD value of ATP in each group	OD value of total protein	Total protein (mg/ml)	ATP content/Total protein	Relative ATP content
			Tube 1	Tube 2	Tube 3
1	Puerarin diet for 10 days	0	155.941	156.846	151.352	154.713	2.9372	1.68134	92.0176	1
2		60	157.615	163.547	165.835	162.332	2.927	1.6713	97.1296	1.05556
3		120	150.519	144.371	149.142	148.011	2.81912	1.56503	94.5736	1.02778
4	Puerarin diet for 25 days	0	245.819	233.715	236.915	238.816	2.80423	1.55037	154.039	1.67401
5		60	255.106	266.983	262.672	261.587	2.7896	1.53595	170.309	1.85083
6		120	304.974	300.274	310.474	305.241	2.84307	1.58862	192.142	2.0881
The Third experiment: We prepared 15 flies for each tube, and three tubes for each group
		Puerarin (μM)	OD value of ATP in each tube			The mean OD value of ATP in each group	OD value of total protein	Total protein (mg/ml)	ATP content/Total protein	Relative ATP content
			Tube 1	Tube 2	Tube 3
1	Puerarin diet for 10 days	0	147.026	157.837	153.348	152.737	2.8965	1.64125	93.0612	1
2		60	139.862	161.234	156.834	152.643	2.9964	1.73966	87.7434	0.942857
3		120	132.626	143.453	131.293	135.791	2.85051	1.59595	85.0845	0.914286
4	Puerarin diet for 25 days	0	152.292	154.245	151.393	152.643	2.92562	1.66994	91.4066	0.98222
5		60	290.284	272.481	272.192	278.319	2.8786	1.62362	171.419	1.842
6		120	350.942	359.165	349.183	353.097	2.81934	1.56525	225.584	2.42404
The Fourth experiment: We prepared 15 flies for each tube, and three tubes for each group
		Puerarin (μM)	OD value of ATP in each tube			The mean OD value of ATP in each group	OD value of total protein	Total protein (mg/ml)	ATP content/Total protein	Relative ATP content
1	Puerarin diet for 10 days	0	140.403	132.345	137.292	136.68	2.737	1.48414	92.0937	1					#REF!
2		60	160.732	141.294	138.284	146.77	2.802	1.54817	94.8023	1.02941
3		120	138.872	125.246	123.136	129.085	2.843	1.58855	81.2591	0.882353					#REF!
4	Puerarin diet for 25 days	0	216.656	229.234	223.545	223.145	2.937	1.68115	132.734	1.44129					#REF!
5		60	279.433	269.139	252.363	266.978	2.924	1.66834	160.026	1.73765
6		120	322.548	319.245	328.215	323.336	2.849	1.59446	202.787	2.20196

## Sheet: Fig.4A, B
	The First experiment: anti-starvation
	Puerarin diet for 10 days (The number of survival flies at time course)						Puerarin diet for 25 days (The number of survival flies at time course)
	Hours	0 μM Puerarin	60 μM Puerarin	120 μM Puerarin			Hours	0 μM Puerarin	60 μM Puerarin	120 μM Puerarin
	0	0	0	0			0	0	0	0
	12	0	0	0			12	0	0	0
	15	0	3	1			15	1	0	0
	18	0	4	0			18	3	2	0
	19	0	0	0			21	3	4	1
	21	0	2	1			24	8	5	7
	22	9	0	2			27	7	9	8
	24	3	3	1			30	17	12	9
	25	2	0	3			33	13	12	15
	27	5	5	3			36	5	9	12
	28	3	0	4			39	3	5	4
	30	3	6	1			42	0	2	3
	31	4	7	4			43	0	0	1
	33	8	4	5
	34	5	4	5			Median of lifespan	27	27	30
	36	2	4	6
	37	4	3	3
	39	2	2	3
	40	3	3	4
	42	2	2	3
	43	2	1	2
	45	2	1	3
	47	1	3	0
	48	0	3	1
	49	0	0	4
	50	0	0	1
	Median of lifespan	31	30	33
		60	60	60	0			60	60	60
	The Second experiment: anti-starvation
	Puerarin diet for 10 days (The number of survival flies at time course)						Puerarin diet for 25 days (The number of survival flies at time course)
	Hours	0 μM Puerarin	60 μM Puerarin	120 μM Puerarin			Hours	0 μM Puerarin	60 μM Puerarin	120 μM Puerarin
	0	0	0	0			0	0	0	0
	15	0	0	0			12	0	0	0
	17	4	3	0			16	2	2	1
	19	2	2	1			20	6	5	2
	21	1	3	1			24	6	5	6
	23	5	6	5			27	14	13	7
	25	6	6	5			30	5	5	7
	28	4	7	7			33	12	8	8
	30	10	5	3			36	8	10	11
	36	10	6	6			40	4	6	8
	38	6	17	17			42	3	3	5
	40	5	1	6			44	0	3	3
	43	4	1	3			45	0	0	2
	45	3	2	2						0
	47	0	1	2			Median of lifespan	27	30	32
	50	0	0	2
	Median of lifespan	28	30	30
		60	60	60				60	60	60
	The Third experiment: anti-starvation
	Puerarin diet for 10 days (The number of survival flies at time course)						Puerarin diet for 25 days (The number of survival flies at time course)
	Hours	0 μM Puerarin	60 μM Puerarin	120 μM Puerarin			Hours	0 μM Puerarin	60 μM Puerarin	120 μM Puerarin
	0	0	0	0			0	0	0	0
	12	0	0	0			12	1	0	0
	15	0	1	1			15	1	2	0
	18	0	2	0			18	2	1	2
	19	5	1	0			21	2	2	1
	23	4	3	4			24	12	6	5
	25	6	4	4			27	8	6	6
	27	10	9	5			30	11	11	10
	30	5	4	6			33	11	14	12
	33	5	8	4			36	6	8	9
	35	5	8	6			40	3	5	6
	38	8	6	10			44	3	5	5
	41	5	4	8			45	0	0	4
	44	6	4	4
	47	1	3	3			Median of lifespan	27	30	34
	48	0	3	3
	49	0	0	2
	Median of lifespan	28	30	36
		60	60	60				60	60	60

## Sheet: Fig.4D, E
The First experiment: anti-oxidation
	Puerarin diet for 10 days (The number of survival flies at time course)							Puerarin diet for 25 days (The number of survival flies at time course)
Days	0 μM Puerarin	60 μM Puerarin	120 μM Puerarin				Days	0 μM Puerarin	60 μM Puerarin	120 μM Puerarin
0	0	0	0				0	0	0	0
2	0	0	0				2	0	0	0
3	4	2	1				3	6	4	3
4	4	2	0				4	8	5	4
5	4	2	2				5	5	5	4
6	2	2	2				6	6	4	5
7	2	4	5				7	5	6	4
8	5	6	4				8	4	5	3
9	5	4	8				9	3	5	5
10	4	5	3				10	4	2	3
11	3	4	1				11	2	4	6
12	1	2	1				12	4	5	4
14	1	3	6				13	3	2	3
15	4	3	2				14		3	3
16	5	2	1						0	3
17	2	1	2							0
18	2	2	2				Median of lifespan	6	7	8
19	1	5	3
20	1	1	2
21	0	0	4
	0	0	1
Median of lifespan	8	9	10
	50	50	50					50	50	50
The Second experiment: anti-oxidation
	Puerarin diet for 10 days (The number of survival flies at time course)							Puerarin diet for 25 days (The number of survival flies at time course)
Days	0 μM Puerarin	60 μM Puerarin	120 μM Puerarin				Days	0 μM Puerarin	60 μM Puerarin	120 μM Puerarin
0	0	0	0				0	0	0	0
2	0	0	0				2	0	0	0
3	5	3	1				3	8	5	4
4	5	2	1				4	5	5	3
5	3	2	2				5	5	6	5
6	1	3	1				6	4	2	3
7	2	3	6				7	4	4	6
8	4	3	3				8	2	3	4
9	5	6	5				9	3	7	3
10	5	4	5				10	6	7	7
11	4	3	2				11	3	3	4
12	2	1	1				12	4	4	3
14	1	2	3				13	6	4	4
15	2	5	5				14			4
16	4	4	3				Median of lifespan	6	7	8
17	3	3	3
18	2	2	2
19	1	2	3
20	1	2	2
21	0	0	2
Median of lifespan	8	9	10
	50	50	50					50	50	50
The Third experiment: anti-oxidation
	Puerarin diet for 10 days (The number of survival flies at time course)							Puerarin diet for 25 days (The number of survival flies at time course)
Days	0 μM Puerarin	60 μM Puerarin	120 μM Puerarin				Days	0 μM Puerarin	60 μM Puerarin	120 μM Puerarin
0	0	0	0				0	0	0	0
2	0	0	0				2	0	0	0
3	4	2	1				3	8	3	2
4	4	2	0				4	4	6	4
5	4	2	2				5	6	5	6
6	2	2	2				6	4	3	3
7	2	4	5				7	6	9	4
8	7	6	4				8	4	3	3
9	5	5	8				9	4	3	5
10	3	3	2				10	4	3	6
11	3	5	5				11	5	7	2
12	1	2	1				12	3	4	5
14	1	3	3				13	2	4	6
15	4	3	2				14			4
16	2	2	1							0
17	4	1	2				Median of lifespan	6	6	8
18	2	2	2
19	1	5	3
20	1	1	2
21	0	0	4
	0	0	1
Median of lifespan	8	9	10
	50	50	50					50	50	50
The Fourth experiment: anti-oxidation
	Puerarin diet for 10 days (The number of survival flies at time course)							Puerarin diet for 25 days (The number of survival flies at time course)
Days	0 μM Puerarin	60 μM Puerarin	120 μM Puerarin				Days	0 μM Puerarin	60 μM Puerarin	120 μM Puerarin
0	0	0	0				0	0	0	0
2	0	1	0				2	0	0	1
3	3	1	1				3	5	4	1
4	3	2	1				4	8	6	4
5	5	3	4				5	9	7	8
6	3	2	5				6	6	5	5
7	3	3	5				7	2	4	3
8	5	5	4				8	3	4	5
9	4	5	2				9	5	5	5
10	4	3	6				10	3	3	4
11	4	7	2				11	3	2	2
12	2	2	3				12	4	6	5
14	3	2	3				13	2	4	5
15	3	1	2				14			2
16	2	3	3				Median of lifespan	5	6	7
17	3	4	3
18	2	2	3
19	1	3	2
20	0	1	1
21
Median of lifespan	8	10	9
	50	50	50					50	50	50

## Sheet: Fig.4G, H
	The First experiment: anti-heat shock
		Puerarin diet for 10 days (The number of survival flies at time course)							Puerarin diet for 25 days (The number of survival flies at time course)
	Hours	0 μM Puerarin	60 μM Puerarin	120 μM Puerarin				Hours	0 μM Puerarin	60 μM Puerarin	120 μM Puerarin
	0	0	0	0				0	0	0	0
	0.5	0	0	0				0.5	0	0	0
	1.5	1	3	2				1	5	3	3
	2	1	2	3				1.5	9	7	8
	2.5	0	13	11				2	8	10	13
	3	17	9	15				2.5	10	9	6
	3.5	12	18	18				3	14	7	12
	4	9	8	4				3.5	10	11	10
	4.5	6	5	3				4	2	11	6
	5	6	2	4				4.5	2	2	2
		8	0	0
	Median of lifespan	3	3	2.5				Median of lifespan	2	2.5	2
		60	60	60					60	60	60
	The Second experiment: anti-heat shock
		Puerarin diet for 10 days (The number of survival flies at time course)							Puerarin diet for 25 days (The number of survival flies at time course)
	Hours	0 μM Puerarin	60 μM Puerarin	120 μM Puerarin				Hours	0 μM Puerarin	60 μM Puerarin	120 μM Puerarin
	0	0	0	0				0	0	0	0
	0.5	0	0	1				0.5	4	0	3
	1	0	1	2				1	7	9	7
	1.5	1	2	2				1.5	5	8	4
	2	4	3	9				2	4	8	8
	2.5	8	13	8				2.5	13	11	7
	3	11	8	13				3	9	12	8
	3.5	6	11	7				3.5	6	4	12
	3.75	5	5	5				4	6	3	7
	4	11	6	5				4.5	3	5	4
	4.25	4	7	3					3	0	0
	4.5	2	4	5
		5	0	0
		3	0	0
	Median of lifespan	3	3	2.5				Median of lifespan	2	2.5	2
		60	60	60					60	60	60
	The Third experiment: anti-heat shock
		Puerarin diet for 10 days (The number of survival flies at time course)							Puerarin diet for 25 days (The number of survival flies at time course)
	Hours	0 μM Puerarin	60 μM Puerarin	120 μM Puerarin				Hours	0 μM Puerarin	60 μM Puerarin	120 μM Puerarin
	0	0	0	0				0	0	0	0
	0.5	3	1	3				0.5	1	2	0
	1	3	2	3				1	5	7	4
	1.5	7	4	6				1.5	13	7	12
	2	3	6	6				2	8	7	8
	2.5	6	8	3				2.5	8	6	9
	3	5	8	11				3	12	9	11
	3.5	8	9	12				3.5	6	9	9
	4	7	5	9				4	7	8	7
	4.5	6	7	4				4.5	0	5	0
	5	6	5	3
	5.5	6	5	0
	Median of lifespan	3	3	2.5				Median of lifespan	2	2.5	2
		60	60	60					60	60	60
	The Fourth experiment: anti-heat shock
		Puerarin diet for 10 days (The number of survival flies at time course)							Puerarin diet for 25 days (The number of survival flies at time course)
	Hours	0 μM Puerarin	60 μM Puerarin	120 μM Puerarin				Hours	0 μM Puerarin	60 μM Puerarin	120 μM Puerarin
	0	0	0	0				0	0	0	0
	0.5	3	0	1				0.5	0	4	3
	1	4	3	5				1	4	9	6
	1.5	6	5	6				1.5	11	4	3
	2	6	9	3				2	6	8	6
	2.5	3	10	6				2.5	8	8	8
	3	2	7	6				3	6	6	8
	3.5	10	11	9				3.5	12	7	9
	4	7	11	13				4	8	7	12
	4.5	5	4	8				4.5	5	7	5
	5	9	0	3
		5	0	0
	Median of lifespan	3	2.5	3				Median of lifespan	2.5	2	2.5
		60	60	60					60	60	60

[truncated: 4 more sheets: Fig.5A, Supplementary Fig.1, Supplementary Fig.2A, RT-qPCR data]
