# Supplementary material for: Puerarin extends the lifespan of Drosophila melanogaster by activating autophagy
Source: Royal Society of Chemistry journal article supplement (doi:10.1039/d2fo02800j), 2023-01-01

**Supplementary Figure 1. Puerarin extends lifespan of *D. melanogaster*.**

The flies were fed with or without puerarin-contained diet. Then, the lifespan of these male flies was recorded. (A) The effects of various concentrations of puerarin on lifespan of female Canton-S flies (n = 120 flies for each group). (B) The mean and median of lifespan in (A), #*p*<0.01 *versus* control (0 puerarin). (C) The effects of puerarin on lifespan of male Canton-S flies (n = 120 flies for each group). (D) The mean and median of lifespan in (C), #*p*<0.01 *versus* control. (E) The effects of puerarin on lifespan of female W1118 flies (n = 120 flies for each group). (F) The mean and median of lifespan in (E), #*p*<0.01 *versus* control. (G) The effects of puerarin on lifespan of male W1118 flies (n = 120 flies for each group). (H) The mean and median of lifespan in (G), #*p*<0.01 *versus* control.

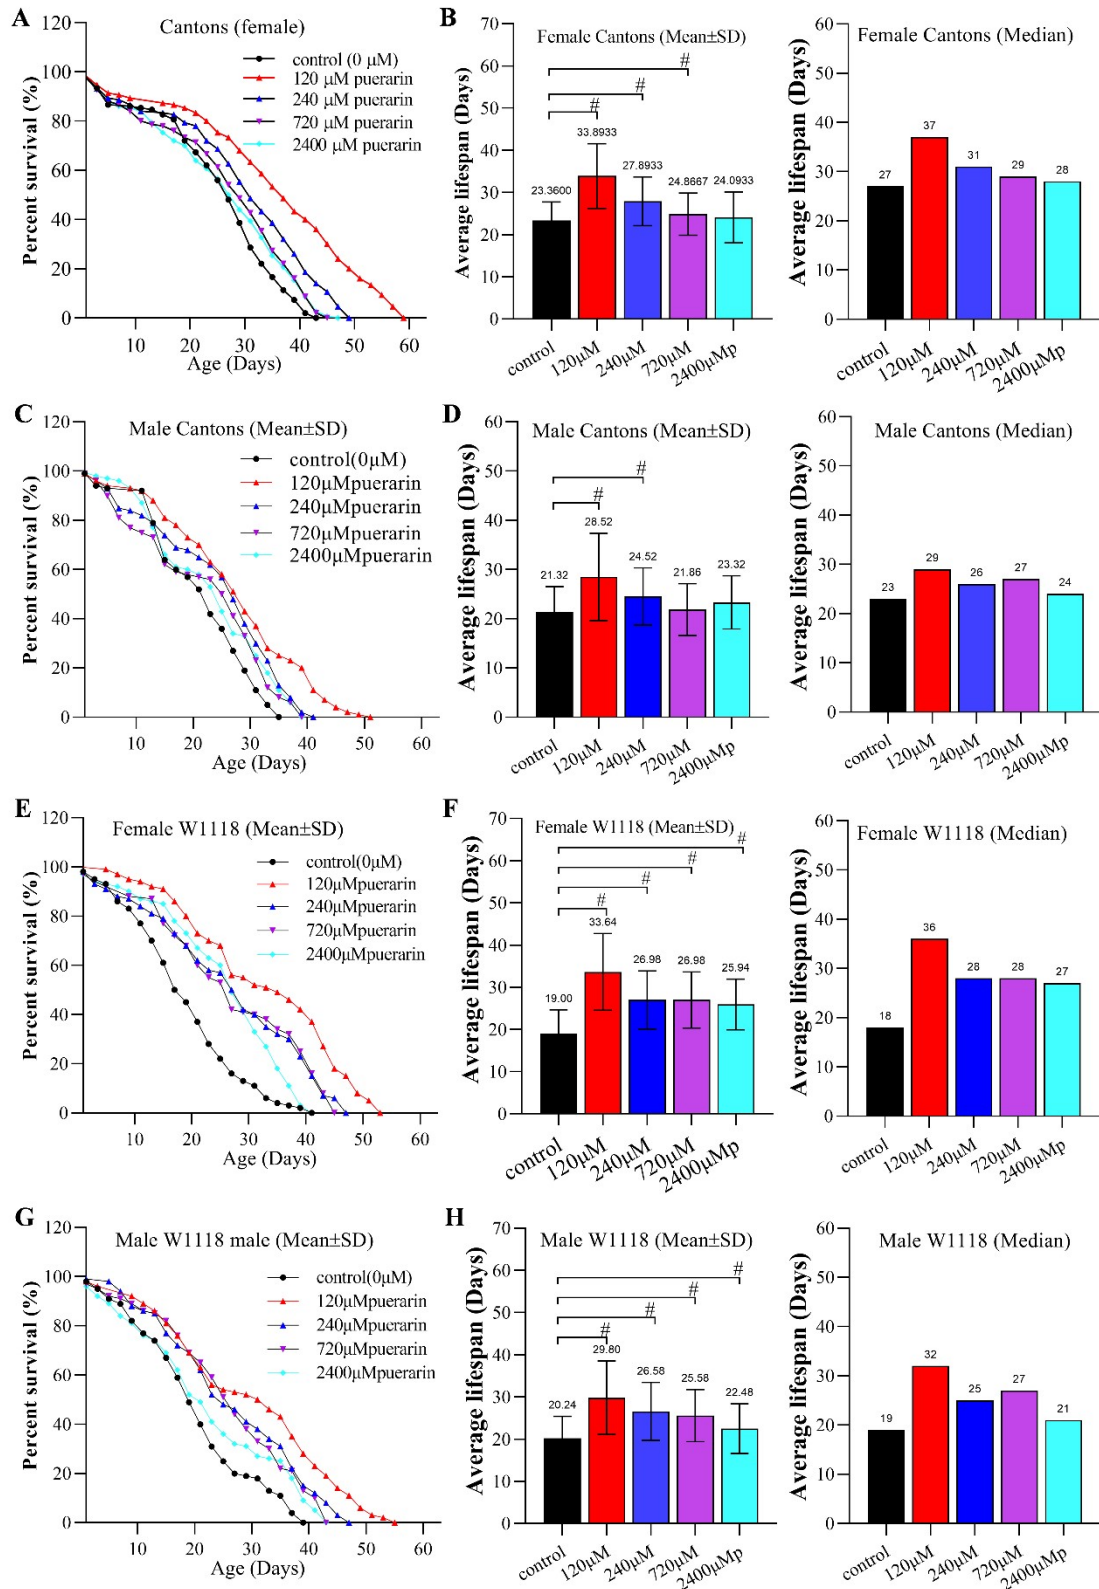

**Supplementary Figure 2. Puerarin-induced longevity of male flies (F0 generation) may not be passed on to the descendants (F1 generation).**

To determine whether puerarin-induced longevity of male flies can be passed on to the descendants, the male Canton-S flies were fed with 120  $\mu$ M puerarin supplementation

for 25 days. These virgin male flies were used to mate with virgin female Canton-S flies for 2 days in 10 vials, and 3 male flies and 3 female flies were placed in a vial. Then, the parent flies were removed. Next, the male and female descents of each group were collected. Finally, the lifespan of these descents was calculated (A).

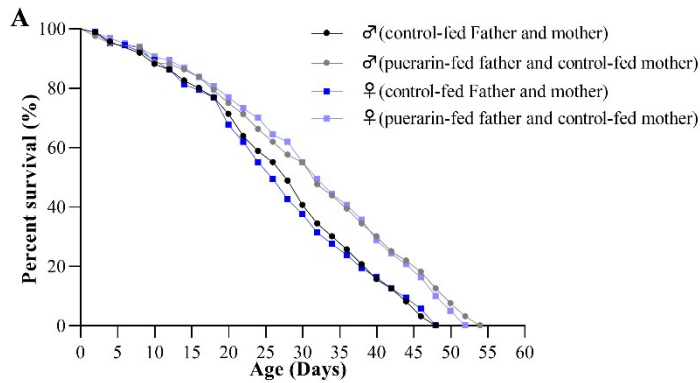

**Supplementary Figure 3. Puerarin increases the number of lysosomes in the gut of male *D. melanogaster* (Canton-S).**

In the LysoTracker-staining experiment, the midguts were dissected from wild-type flies that reared on control or puerarin diets for 10 days or 25 days. Each gut was dissected in phosphate buffer, and stained with 1  $\mu$ M LysoTracker Red for 3 min. They were captured under an inverted fluorescence microscope (Zeiss, Oberkochen, Germany).

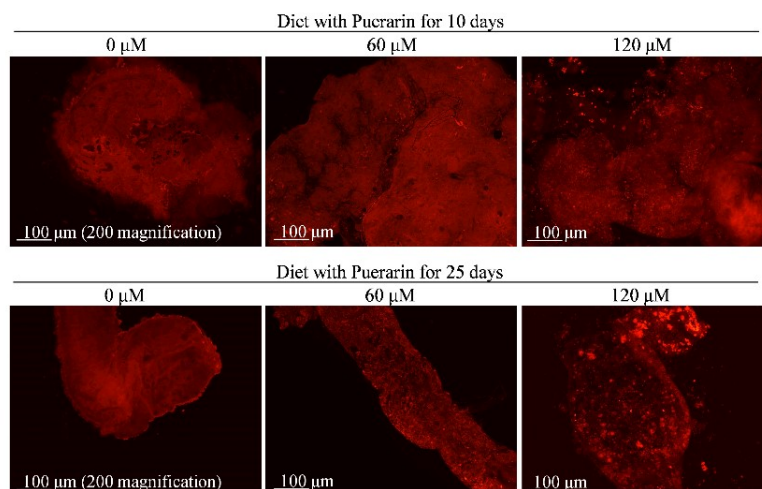

Supplement: d2fo02800j3.pdf [file d2fo02800j3.pdf]
